# Supplementary material for: Amaryllidaceae-Type Alkaloids from Pancratium maritimum: Apoptosis-Inducing Effect and Cell Cycle Arrest on Triple-Negative Breast Cancer Cells
Source: MDPI journal article supplement (doi:10.3390/molecules27185759), 2022-09-06
Supplement: s1 [file s1]

## Supplementary Information

### **Amaryllidaceae-type alkaloids from *Pancratium maritimum*: apoptosis-inducing effect and cell cycle arrest on triple- negative breast cancer cells**

Shirley A.R. Sancha<sup>1</sup>, Adriana Gomes<sup>2</sup>, Joana B. Loureiro<sup>2</sup>, Lucília Saraiva<sup>2\*</sup>, Maria-José U. Ferreira<sup>1\*</sup>.

<sup>1</sup>Research Institute for Medicines (iMed.Ulisboa), Faculty of Pharmacy, University of Lisbon, Av. Prof. Gama Pinto, 1649-003 Lisbon, Portugal.

<sup>2</sup> LAQV/REQUIMTE, Department of Biological Sciences, Laboratory of Microbiology, Faculty of Pharmacy, University of Porto, Rua de Jorge Viterbo Ferreira 228, Porto, 4050-313, Portugal

\* Corresponding authors: e-mail address: mjuferreira@ff.ulisboa.pt (Maria-José U. Ferreira);

lucilia.saraiva@ff.up.pt

#### **Table of contents**

|                                                                                                                                             |     |
|---------------------------------------------------------------------------------------------------------------------------------------------|-----|
| <b>Figure S1:</b> Extraction and fractionation of methanol extract of <i>P. maritimum</i> , and the isolated compounds ( <b>1-11</b> )..... | S2  |
| <b>Table S1:</b> Fractions obtained from acid-base extraction.....                                                                          | S3  |
| <b>Spectroscopic data of compounds</b> .....                                                                                                | S3  |
| <b>NMR spectra of some compounds</b> .....                                                                                                  | S7  |
| <b>References</b> .....                                                                                                                     | S16 |

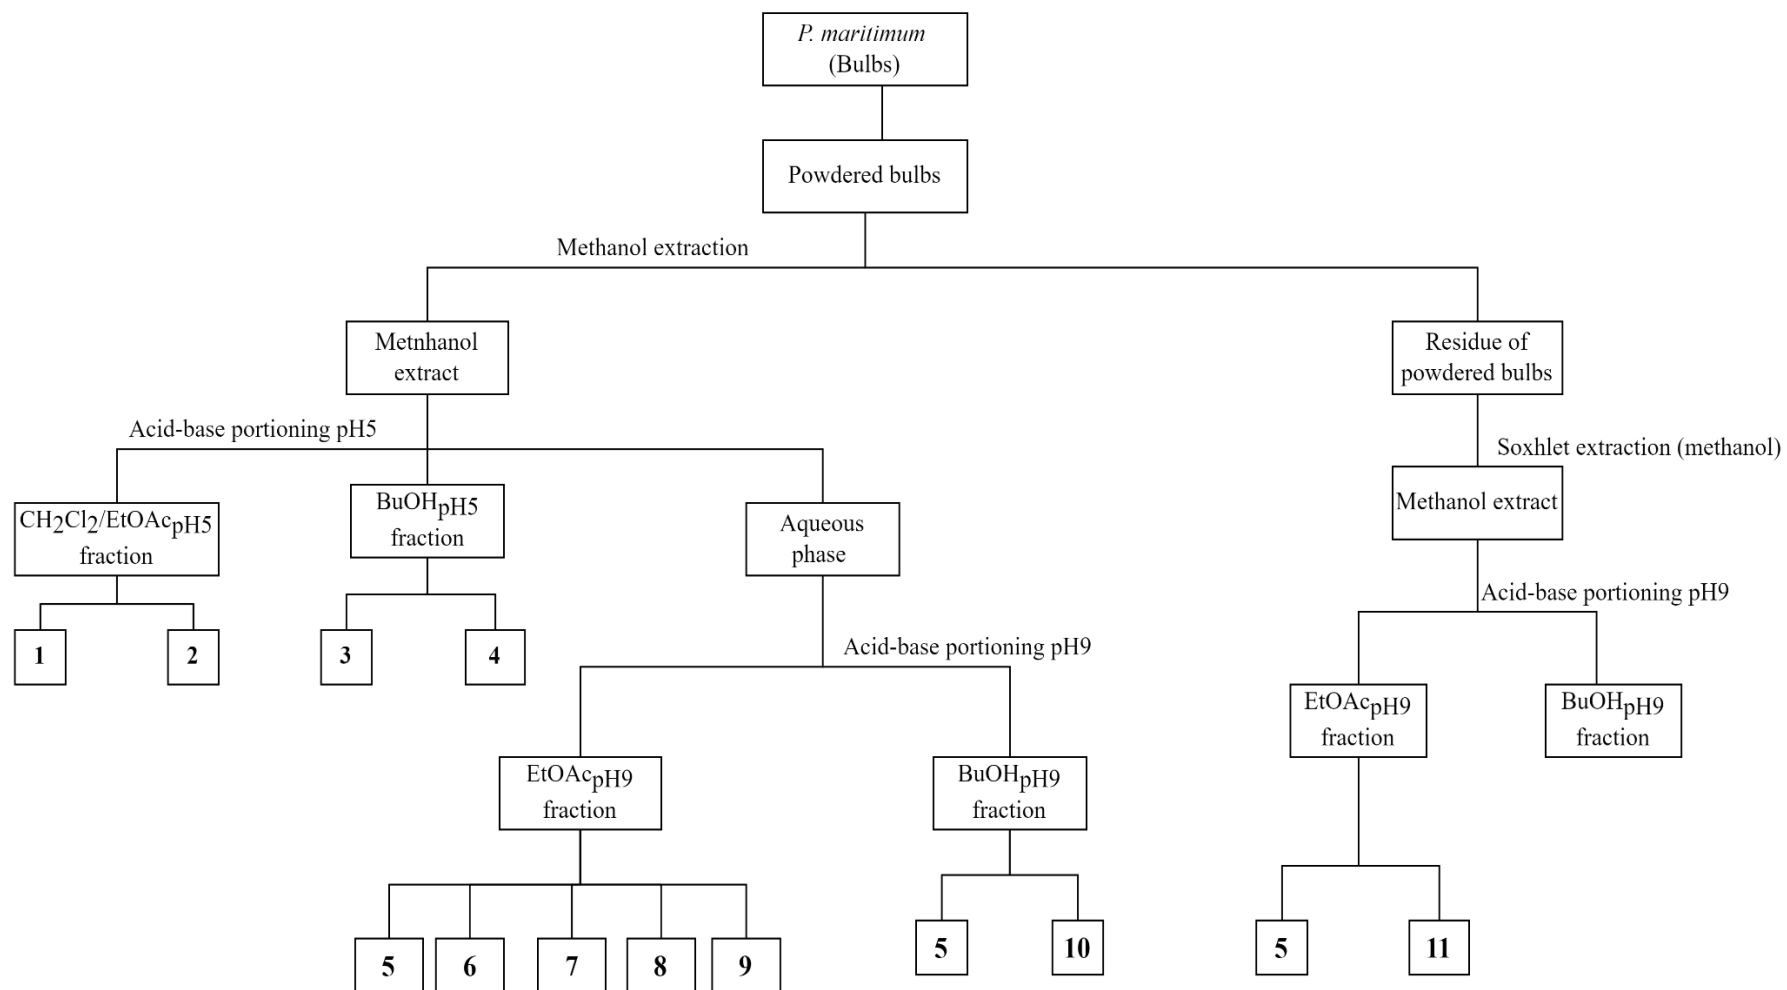

**Figure S1:** Extraction and fractionation of methanol extract of *P. maritimum*, and the isolated compounds (1-11).

**Table S1:** Fractions obtained from acid-base extraction.

| Fractions                                      | Quantity (g) |                    |
|------------------------------------------------|--------------|--------------------|
|                                                | Bulbs        | Soxhlet extraction |
| CH <sub>2</sub> Cl <sub>2</sub> <sub>pH5</sub> | 13.9         | ---                |
| EtOAc <sub>pH5</sub>                           | 20           | ---                |
| <i>n</i> -BuOH <sub>pH5</sub>                  | 109          | ---                |
| EtOAc <sub>pH9</sub>                           | 10.3         | 3.5                |
| <i>n</i> -BuOH <sub>pH9</sub>                  | 32.2         | 4.5                |

### Spectroscopic data of compounds

#### 4,6-dimethoxy-2-hydroxy-acetophenone (1)

Amorphous powder. ESI-MS (positive mode) *m/z* (rel.int) 197 [M + H]<sup>+</sup> (100). <sup>1</sup>H NMR (300 MHz, CDCl<sub>3</sub>) δ 14.0 (*s*, 2-OH), 6.05 (1H, *d*, *J* = 2.4 Hz, H-3), 5.91 (*d*, *J* = 2.4 Hz, H-5), 3.85 (*s*, OCH<sub>3</sub>), 3.81 (*s*, OCH<sub>3</sub>), 2.60 (*s*, COCH<sub>3</sub>), ppm. <sup>13</sup>C NMR (75 MHz, CDCl<sub>3</sub>) δ 203.2 (COCH<sub>3</sub>), 167.7 (C-2), 166.2 (C-4), 163.0 (C-6), 106.1 (C-1), 93.6 (C-3), 90.9 (C-5), 55.7 (6-OCH<sub>3</sub>), 55.5 (6-OCH<sub>3</sub>), 33.0 (COCH<sub>3</sub>), ppm.

#### *N-trans-feruloyl-tyramine* (2)

White crystals, mp: 90-93 °C (hexane/EtOAc). (lit. 91 °C) [1]. IR,  $\nu_{\max}$ , cm<sup>-1</sup> (KBr): 3495, 3363, 3229, 1647, 1548 cm<sup>-1</sup>. ESI-MS (positive mode) *m/z* (rel. int) 330 [M + H]<sup>+</sup> (100). <sup>1</sup>H NMR (300 MHz, CDCl<sub>3</sub>/CD<sub>3</sub>OD; 4:1) δ 7.48 (1H, *d*, *J* = 15.6 Hz, H-3), 7.05 (2H, *d*, *J* = 8.6 Hz H-4'/H-8'), 7.02 (2H, *d*, *J* = 1.7 Hz H-5), 7.01 (1H, *dd*, *J* = 8.5, 1.7 Hz H-9), 6.84 (2H, *d*, *J* = 8.5 Hz, H-5'/H-7'), 6.78 (1H, *d*, *J* = 8.3 Hz, H-8), 6.29 (1H, *d*, *J* = 15.6 Hz, H-2), 3.88 (3H, *s*, OCH<sub>3</sub>), 3.53 (2H, *t*, *J* = 7.1 Hz, H-1'), 2.78 (2H, *t*, *J* = 7.1 Hz, H-2'), ppm. <sup>13</sup>C NMR (75 MHz, CDCl<sub>3</sub>/CD<sub>3</sub>OD, 4:1) δ 167.6 (C-1), 155.5 (C6'), 148.1 (C-6), 147.6 (C-7), 141.3 (C-3), 130.0 (C-3''), 129.9 (C-4'/C-8'), 127.1 (C-4), 122.3 (C-9), 117.7 (C-2), 115.5 (C-5'), 115.3 (C-7'), 110.4 (C-5/C-8), 55.8 (OCH<sub>3</sub>), 41.3 (C-1''), 34.7 (C-2'), ppm.

#### Haemanthidine (3)

Amorphous powder.  $[\alpha]_D^{25}$  – 58.9 (*c* 0.28, CHCl<sub>3</sub>); lit.  $[\alpha]_D^{25}$  – 41 (CHCl<sub>3</sub>) [2]. ESI-MS (positive mode) *m/z* (rel. int) 318 [M + H]<sup>+</sup> (100). <sup>1</sup>H NMR (300 MHz, CDCl<sub>3</sub>/CD<sub>3</sub>OD, 4:1; epimer A, β-OH) δ 6.86 (1H, *s*, H-7), 6.79 (1H, *s*, H-10), 6.45 (1H, *d*, *J* = 5.4 Hz, H-1), 6.28

(1H, *dd*, *J* = 5.1, 1.1 Hz, H-2) 5.92 (2H, *m*, OCH<sub>2</sub>O), 4.93 (1H, *s*, H-6), 3.93 (3H, *m*, H-3/H-11), 3.66 (1H, *dd*, *J* = 13.5, 4.7 Hz, H-4a), 3.37 (3H, *s*, OCH<sub>3</sub>), 3.31 (1H, *dd*, *J* = 14.2, 7.4 Hz, H-12-*exo*), 3.13 (*dd*, *J* = 14.2, 3.2 Hz, H-12-*endo*), 2.31 (1H, *td*, *J* = 13.6, 4.4 Hz, H-4 $\alpha$ ), 1.98 (1H, *m*, H-4 $\beta$ ), ppm. <sup>1</sup>H NMR (300 MHz, CDCl<sub>3</sub>/CD<sub>3</sub>OD, 4:1; epimer B,  $\alpha$ -OH)  $\delta$  6.91 (1H, *s*, H-7), 6.83 (1H, *s*, H-10), 6.42 (1H, *d*, *J* = 5.4 Hz, H-1), 6.24 (1H, *dd*, *J* = 5.1, 1.0 Hz, H-2), 5.92 (2H, *m*, OCH<sub>2</sub>O), 5.51 (1H, *s*, H-6), 4.07 (1H, *dd*, *J* = 14.2, 6.8 Hz, H-12-*exo*), 3.93 (3H, *m*, H-3/H-11), 3.46 (*dd*, *J* = 13.2, 5.0 Hz, H-4a), 3.38 (3H, *s*, OCH<sub>3</sub>), 2.82 (1H, *dd*, *J* = 14.3, 2.6 Hz, H-12-*endo*), 2.17 (1H, *dd*, *J* = 13.7, 4.4 Hz, H-4 $\alpha$ ), 1.98 (1H, *m*, H-4 $\beta$ ), ppm. <sup>13</sup>C NMR (75 MHz, CDCl<sub>3</sub>/CD<sub>3</sub>OD, 4:1, epimer A)  $\delta$  148.4 (C-9), 146.8 (C-8), 137.3 (C-10a), 130.3 (C-2), 128.4 (C-2), 128.6 (C-6a), 128.4 (C-1), 109.7 (C-7), 103.2 (C-10), 101.6 (OCH<sub>2</sub>O), 88.5 (C-6), 78.7 (C-11), 73.4 (C-3), 58.7 (C-12), 57.1 (C-4a), 56.5 (OCH<sub>3</sub>), 51.1 (C-10b), 27.8 (C-4), ppm. <sup>13</sup>C NMR (75 MHz, CDCl<sub>3</sub>/CD<sub>3</sub>OD, 4:1, epimer B)  $\delta$  148.1 (C-9), 146.9 (C-8), 136.4 (C-10a), 130.3 (C-2), 129.7 (C-6a), 128.6 (C-1), 108.5 (C-7), 103.9 (C-10), 101.5 (OCH<sub>2</sub>O), 86.1 (C-6), 79.5 (C-11), 73.6 (C-3), 62.6 (C-4a), 56.6 (OCH<sub>3</sub>), 52.9 (C-12), 50.6 (C-10b), 28.2 (C-4) ppm.

#### Hippeastrine (4)

Amorphous powder.  $[\alpha]_D^{25} + 152.2$  (*c* 0.30, CHCl<sub>3</sub>); lit.  $[\alpha]_D^{25} + 160$  (CHCl<sub>3</sub>) [2]. ESI-MS (positive mode) *m/z* (rel. int) 316 [M + H]<sup>+</sup> (100). <sup>1</sup>H NMR (300 MHz, CDCl<sub>3</sub>)  $\delta$  7.46 (1H, *s*, H-7), 6.95 (1H, *s*, H-10), 6.07 (2H, *dd*, *J* = 4.8, 1.2 Hz, OCH<sub>2</sub>O), 5.66 (1H, *br s*, H-3), 4.59 (1H, *br s*, H-1), 4.40 (1H, *dp*, *J* = 3.7, 1.9 Hz, H-2), 3.15 (1H, *ddd*, *J* = 10.1, 7.3, 3.3 Hz, H-12 $\alpha$ ), 2.91 (1H, *dd*, *J* = 9.5, 2.2 Hz, H-10b), 2.64 (1H, *d*, *J* = 9.5 Hz, H-4a), 2.52 (2H, *m*, H-11), 2.26 (*q*, *J* = 9.3 Hz, H-12 $\beta$ ), 2.06 (3H, *s*, NCH<sub>3</sub>), ppm. <sup>13</sup>C NMR (75 MHz, CDCl<sub>3</sub>)  $\delta$  164.8 (C-6), 151.9 (C-9), 148.0 (C-8), 145.1 (C-4), 139.4 (C-10a), 118.6 (C-3), 109.9 (C-7), 108.8 (C-10), 82.3 (C-1), 67.2 (C-4a), 66.9 (C-2), 56.2 (C-12), 43.6 (NCH<sub>3</sub>), 39.8 (C-10b), 27.9 (C-12), ppm.

#### Lycorine (5)

Amorphous powder.  $[\alpha]_D^{25} - 70.6$  (*c* 0.31, MeOH); lit.  $[\alpha]_D^{25} - 83.8$  (EtOH) [2]. IR  $\nu_{\max}$  cm<sup>-1</sup> (KBr): 3334, 1485, 744. ESI-MS (positive mode) *m/z* (rel. int) 288 [M + H]<sup>+</sup> (100). <sup>1</sup>H NMR (300 MHz, DMSO-*d*<sub>6</sub>)  $\delta$  6.80 (1H, *s*, H-10), 6.67 (1H, *s*, H-7), 5.95 (2H, *dd*, *J* = 4.1, 0.9 Hz, OCH<sub>2</sub>O), 5.37 (1H, *bs*, H-3), 4.85 (1H, *d*, *J* = 6.2 Hz, 2-OH), 4.75 (1H, *d*, *J* = 4.2 Hz, 1-OH), 4.27 (1H, *bs*, H-1), 4.04 (1H, *d*, *J* = 14.2 Hz, H-6 $\beta$ ), 3.96 (1H, *bs*, H-2), 3.29 (1H, *d*, *J* = 14.2 Hz, H-6 $\alpha$ ), 3.18 (1H, *ddd*, *J* = 9.1, 7.2, 2.1 Hz, H-12 $\beta$ ), 2.61 (1H, *d*, *J* = 10.4 Hz, H-10b), 2.51 (1H, *m*, H-4a), 2.47 (2H, *m*, H-11), 2.20 (1H, *q*, *J* = 8.5 Hz, H-12 $\alpha$ ) ppm. <sup>13</sup>C NMR (75 MHz, DMSO-*d*<sub>6</sub>)  $\delta$  145.6 (C-9), 145.1 (C-8), 141.6 (C-4), 129.7 (C-6a), 129.5 (C-10a), 118.4 (C-3), 106.9 (C-7), 105.0 (C-10), 100.5 (OCH<sub>2</sub>O), 71.7 (C-2), 70.2 (C-1), 60.7 (C-4a), 56.7 (C-6), 53.2 (C-12), 40.1 (C-10b), 28.1 (C-11) ppm.

### 11 $\alpha$ -hydroxygalanthamine (6)

Amorphous powder.  $[\alpha]_D^{25} - 290.3$  (*c* 0.13, CHCl<sub>3</sub>); lit.  $[\alpha]_D^{25} - 320$  [3]. ESI-MS (positive mode) *m/z* (rel. int) 304 [M + H]<sup>+</sup> (100). <sup>1</sup>H NMR (300 MHz, CDCl<sub>3</sub>)  $\delta$  6.66 (1H, *d*, *J* = 8.2 Hz, H-8), 6.59 (1H, *d*, *J* = 8.2 Hz, H-7), 6.06 (1H, *dd*, *J* = 10.2, 5.1 Hz, H-4), 5.77 (1H, *d*, *J* = 10.2 Hz, H-4a), 5.33 (1H, *bs*, H-1), 4.11 (1H, *bt*, *J* = 4.4 Hz, H-3), 3.82 (3H, *s*, OCH<sub>3</sub>), 3.78 (1H, *d*, *J* = 14.7 Hz, H-6 $\beta$ ), 3.61 (1H, *d*, *J* = 14.7 Hz, H-6 $\alpha$ ), 3.49 (1H, *m*, H-11 $\beta$ ), 3.11 (1H, *bs*, H-12), 2.60 (1H, *bt*, *J* = 15.9, 1.8 Hz, H-2 $\alpha$ ), 2.57 (3H, *s*, NCH<sub>3</sub>), 2.04 (1H, *ddd*, *J* = 15.9, 5.0, 2.5 Hz, H-2 $\beta$ ) ppm. <sup>13</sup>C NMR (75 MHz, CDCl<sub>3</sub>)  $\delta$  147.1 (C-10), 144.3 (C-9), 130.1 (C-10b), 129.5 (C-4), 127.8 (C-6a), 125.4 (C-4a), 121.3 (C-7), 111.5 (C-8), 83.5 (C-1), 67.2 (C-11), 62.9 (C-6), 61.8 (C-3), 61.0 (C-12), 56.0 (OCH<sub>3</sub>), 53.9 (C-10a), 49.2 (NCH<sub>3</sub>), 29.6 (C-2) ppm.

### 2 $\alpha$ -10 $\beta$ $\alpha$ -dihydroxy-9-*O*-demethylhomolycorine (7)

Amorphous powder.  $[\alpha]_D^{25} + 28.2$  (*c* 0.23, MeOH); lit.  $[\alpha]_D^{20} + 40.2$  (MeOH) [4]. ESI-MS (positive mode) *m/z* (rel. int) 334 [M + H]<sup>+</sup> (100). <sup>1</sup>H NMR (300 MHz, DMSO-*d*<sub>6</sub>)  $\delta$  7.32 (1H, *s*, H-7), 7.18 (1H, *s*, H-10), 5.57 (1H, *bs*, H-3), 4.74 (1H, *s*, OH), 4.36 (1H, *bs*, H-1), 4.09 (1H, *bs*, H-2), 3.83 (3H, *s*, OCH<sub>3</sub>), 3.31 (1H, *s*, OH), 3.16 (1H, *s*, OH), 3.06 (1H, *td*, *J* = 8.4, 3.6 Hz, H-12 $\alpha$ ), 2.63 (1H, *s*, H-4a), 2.38 (2H, *m*, H-11), 2.22 (1H, *q*, *J* = 8.7 Hz, H-12 $\beta$ ), 1.83 (3H, *s*, NCH<sub>3</sub>) ppm. <sup>13</sup>C NMR (75 MHz, DMSO-*d*<sub>6</sub>)  $\delta$  163.6 (C-6), 151.7 (C-9), 147.3 (C-8), 142.0 (C-10a), 140.6 (C-4), 119.1 (C-3), 113.1 (C-6a), 112.2 (C-10), 111.8 (C-7), 83.4 (C-1), 69.6 (C-4a), 67.4 (C-10b), 67.3 (C-2), 55.6 (OCH<sub>3</sub>), 55.5 (C-12), 43.5 (NCH<sub>3</sub>), 27.9 (C-11) ppm.

### Epi-galanthamine (8)

Amorphous powder.  $[\alpha]_D^{25} - 326.5$  (*c* 0.10, MeOH).  $[\alpha]_D^{20} - 327$ . (EtOH) [5]. ESI-MS (positive mode) *m/z* (rel. int) 288 [M + H]<sup>+</sup> (100). <sup>1</sup>H NMR (300 MHz, CDCl<sub>3</sub>)  $\delta$  6.66 (1H, *d*, *J* = 8.2 Hz, H-8), 6.61 (1H, *d*, *J* = 8.2 Hz, H-7), 6.05 (1H, *dd*, *J* = 10.3, 1.4 Hz, H-4), 6.01 (1H, *ddd*, *J* = 10.3, 4.6, 1.2 Hz, H-4a), 4.60 (1H, *bs*, H-1), 4.13\* (1H, *m*, H-3), 4.12\* (1H, *d*, *J* = 15.4 Hz, H-6 $\beta$ ), 3.82 (3H, *s*, OCH<sub>3</sub>), 3.69 (1H, *dd*, *J* = 15.2, 1.2 Hz, H-6 $\alpha$ ), 3.28 (1H, *ddd*, *J* = 14.6, 12.7, 1.9 Hz, H-12 $\beta$ ), 3.07 (1H, *dt*, *J* = 14.1, 3.0 Hz, H-12 $\alpha$ ), 2.68 (1H, *m*, H-2 $\beta$ ), 2.40 (3H, *s*, NCH<sub>3</sub>), 2.08 (1H, *ddd*, *J* = 13.6, 10.5, 3.2 Hz, H-11 $\alpha$ ), 1.99 (1H, *ddd*, *J* = 10.6, 8.3, 2.4 Hz, H-2 $\alpha$ ), 1.59 (1H, *ddd*, *J* = 13.8, 4.1, 1.9 Hz, H-11 $\beta$ ), ppm \*overlapped signals. <sup>13</sup>C NMR (75 MHz, CDCl<sub>3</sub>)  $\delta$  146.0 (C-9), 144.3 (C-10), 133.1 (C-10a), 128.8 (C-6a), 127.8 (C-4), 126.8 (C-4a), 122.3 (C-7), 111.4 (C-8), 88.8 (C-1), 62.1 (C-3), 60.5 (C-6), 56.0 (OCH<sub>3</sub>), 53.8 (C-12), 48.3 (C-10b), 41.8 (NCH<sub>3</sub>), 33.7 (C-11), 30.0 (C-2) ppm.

### 8-O-Demethylhomolycorine (9)

Amorphous powder.  $[\alpha]_D^{25} + 90.7$  (c 0.092, CHCl<sub>3</sub>); lit.  $[\alpha]_D^{24} + 89.6$  (CHCl<sub>3</sub>) [5]. ESI-MS (positive mode) m/z (rel. int) 302 [M + H]<sup>+</sup> (100). <sup>1</sup>H NMR (300 MHz, CDCl<sub>3</sub>)  $\delta$  7.59 (1H, s, H-7), 7.01 (1H, s, H-10), 5.52 (1H, m, H-3), 4.76 (1H, dt, J = 4.4, 2.2 Hz, H-1), 3.95 (3H, s, OCH<sub>3</sub>), 3.22 (1H, ddd, J = 10.0, 6.1, 4.2 Hz, H-12 $\alpha$ ), 2.80 (1H, d, J = 10.0 Hz, H-4a), 2.75 (1H, dd, J = 9.8, 2.0 Hz, H-10b), 2.61 (1H, dt, J = 5.4, 2.9 Hz, H-2), 2.50 (2H, m, H-11), 2.30 (1H, dd, J = 18.9, 9.4 Hz, H-12 $\beta$ ), 2.00 (3H, s, NCH<sub>3</sub>), ppm. <sup>13</sup>C NMR (75 MHz, CDCl<sub>3</sub>)  $\delta$  165.8 (C-6), 151.4 (C-9), 146.0 (C-8), 140.3 (C-4), 136.5 (10a), 117.4 (C-6a), 116.3 (C-7), 115.8 (C-3), 110.6 (C-10), 77.6 (C-1), 66.7 (C-4a), 56.4 (C-12), 56.2 (OCH<sub>3</sub>), 43.7 (NCH<sub>3</sub>), 43.6 (C-10b), 31.3 (C-2), 27.9 (11), ppm.

### Tazettine (10)

White crystals, m.p: 208-210 °C, (hexane/EtOAc) (lit. 208 °C) [6].  $[\alpha]_D^{25} + 130.7$  (c 0.09, CHCl<sub>3</sub>);  $[\alpha]_D^{22} + 145$  (CHCl<sub>3</sub>) [6]. IR:  $\nu_{\max}$  cm<sup>-1</sup> (KBr): 3348, 2725, 1253, 1119. ESI-MS (positive mode) m/z (rel. int) 332 [M + H]<sup>+</sup> (100). <sup>1</sup>H NMR (300 MHz, CDCl<sub>3</sub>)  $\delta$  6.85 (1H, s, H-12), 6.49 (1H, s, H-9), 6.13 (1H, d, J = 10.4, 3 Hz, H-2), 5.89 (2H, s, OCH<sub>2</sub>O), 5.61 (1H, m, H-1), 4.95 (1H, d, J = 14.7 Hz, H-8 $\alpha$ ), 4.63 (1H, d, J = 14.8 Hz, H-8 $\beta$ ), 4.14 (1H, m, H-3), 3.46 (3H, s, OCH<sub>3</sub>), 3.30 (1H, d, J = 10.6 Hz, H-6 $\alpha$ ), 2.87 (1H, bs, H-5), 2.68 (1H, d, J = 10.6 Hz, H-6 $\beta$ ), 2.40 (3H, s, N-CH<sub>3</sub>), 2.22 (1H, ddd, J = 15, 5, 3 Hz H-4 $\alpha$ ); 1.62 (1H, ddd, J = 15, 6, 3 Hz H-4 $\beta$ ) ppm. <sup>13</sup>C NMR (75 MHz, CDCl<sub>3</sub>)  $\delta$  146.7 (C-11), 146.5 (C-10), 130.7 (C-2), 128.8 (C-1), 128.1 (C-12a), 125.6 (C-8a), 109.5 (C-12), 104.1 (C-9), 102.1 (C-6a), 101.0 (OCH<sub>2</sub>O), 73.0 (C-3), 70.2 (C-5), 65.6 (C-6), 62.1 (C-8), 56.2 (OCH<sub>3</sub>), 50.0 (C-12b), 42.1 (N-CH<sub>3</sub>), 26.8 (C-4) ppm.

### Haemanthamine (11)

Amorphous powder.  $[\alpha]_D^{25} + 43.7$  (c, 0.5, CHCl<sub>3</sub>); lit.  $[\alpha]_D^{22} + 38.6$  (CHCl<sub>3</sub>) [5]. ESI-MS (positive mode) m/z (rel. int) 302 [M + H]<sup>+</sup> (100). <sup>1</sup>H NMR (300 MHz, CDCl<sub>3</sub>)  $\delta$  6.82 (s, 1H, H-10), 6.47 (1H, s, H-7), 6.41 (1H, d, J = 10.1 Hz, H-1), 6.35 (1H, ddd, J = 10.1, 4.6, 0.8 Hz, H-2), 5.89 (2H, q, J = 1.4 Hz, OCH<sub>2</sub>O), 4.35 (1H, d, J = 16.8 Hz, H-6 $\beta$ ), 4.00 (1H, dd, J = 6.6, 3.4 Hz, H-11), 3.85 (1H, td, J = 4.2, 1.9 Hz, H-3), 3.72 (1H, d, J = 16.8 Hz, H-6 $\alpha$ ), 3.40 (1H, m, H-12 endo), 3.35 (3H, s, OCH<sub>3</sub>), 3.31 (1H, m, H-12 exo), 2.11 (2H, m, H-4). <sup>13</sup>C NMR (75 MHz, CDCl<sub>3</sub>)  $\delta$  146.7 (C-8), 146.4 (C-9), 135.1 (C-10a), 132.2 (C-2), 127.1 (C-1), 126.1 (C-6a), 106.9 (C-7), 103.5 (C-10), 101.0 (OCH<sub>2</sub>O), 79.9 (C-11), 72.7 (C-3), 63.4 (C-12), 62.9 (C-4a), 61.2 (C-6), 56.7 (OCH<sub>3</sub>), 50.3 (C-10b), 28.1 (C-4) ppm.

## NMR spectra of some compounds

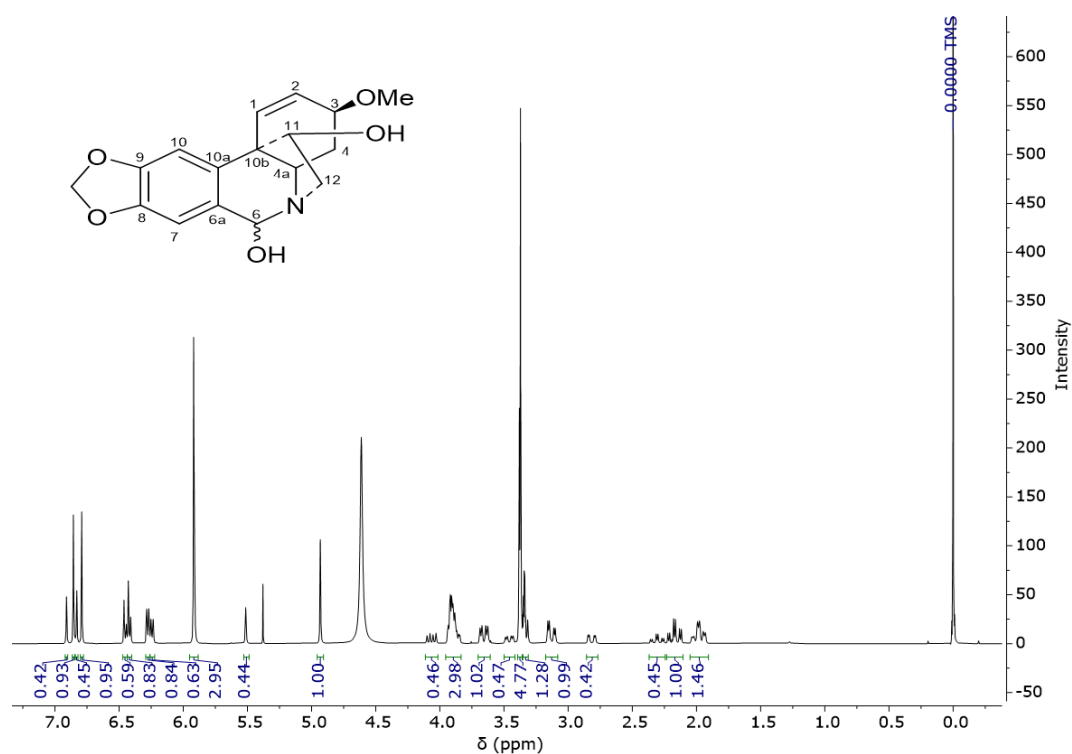

Figure S1. <sup>1</sup>H-NMR spectrum of compound 3 (300 MHz, CDCl<sub>3</sub>/CD<sub>3</sub>OD).

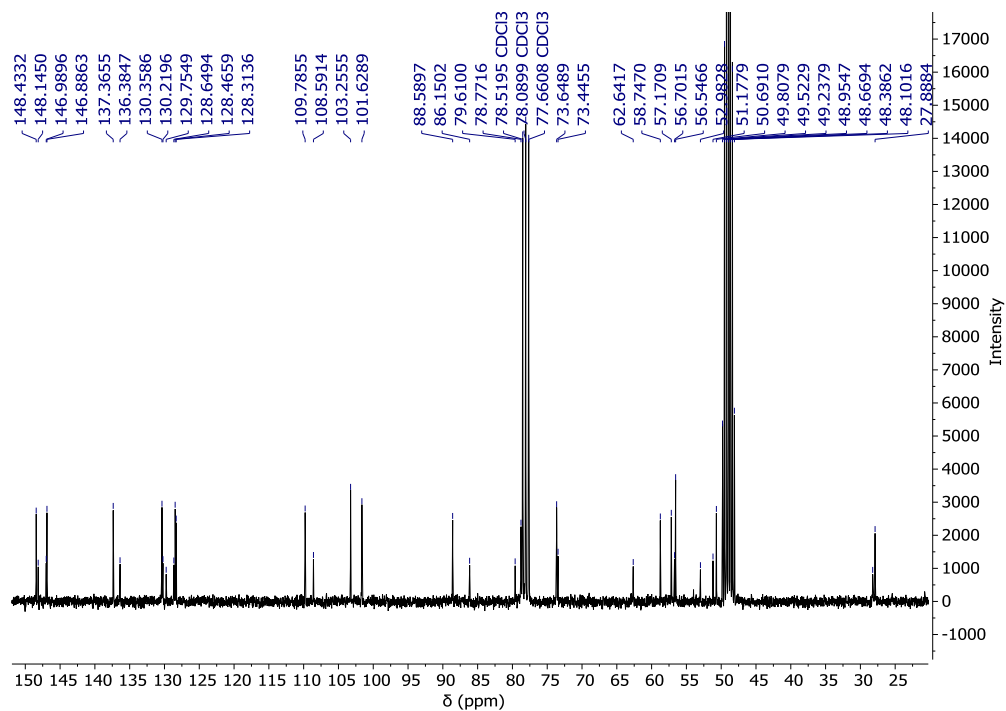

Figure S2. <sup>13</sup>C-NMR spectrum of compound 3 (75 MHz, CDCl<sub>3</sub>/CD<sub>3</sub>OD).

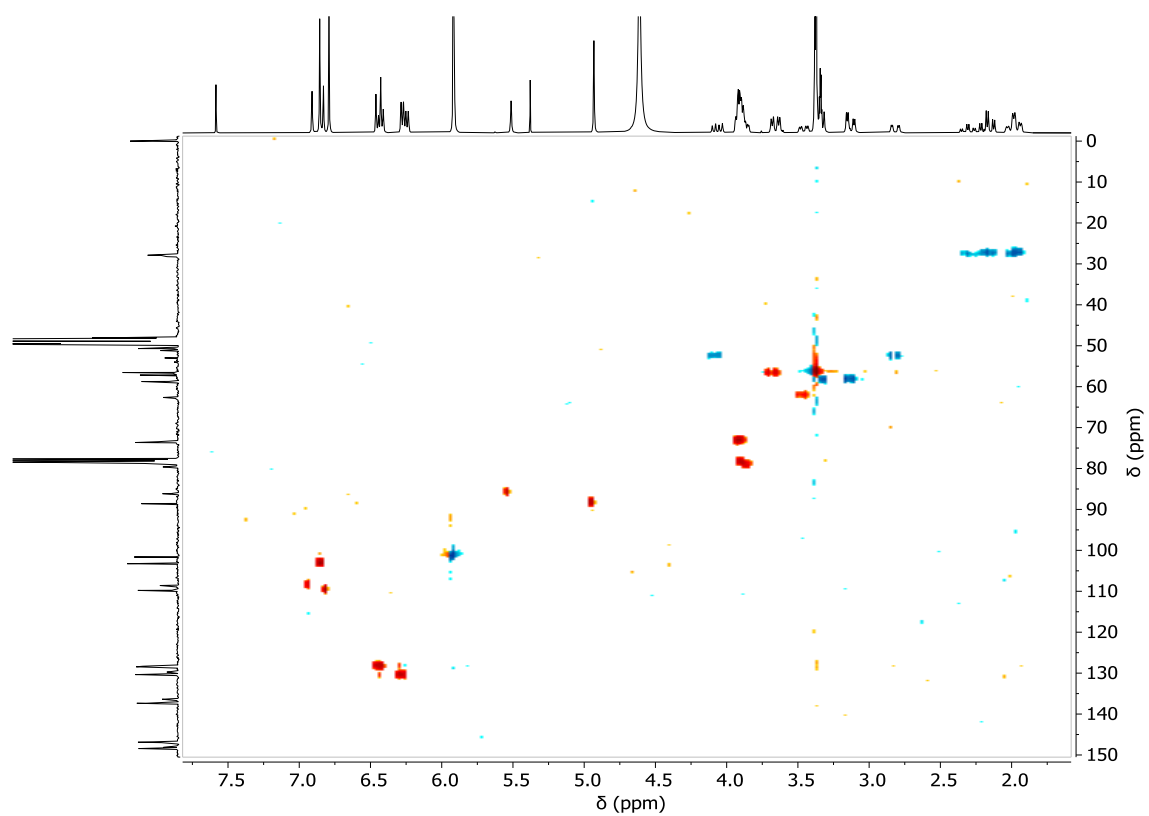

**Figure S3.** HMQC spectrum of compound **3**.

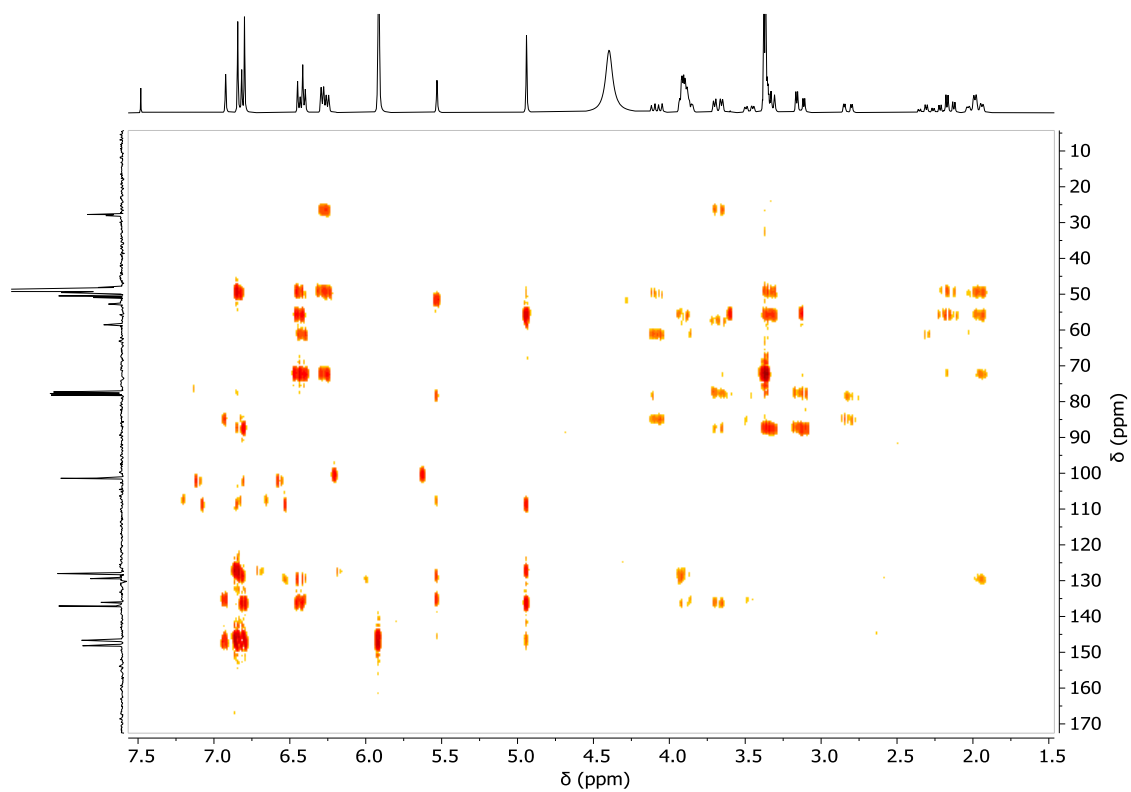

**Figure S4.** HMBC spectrum of compound **3**.



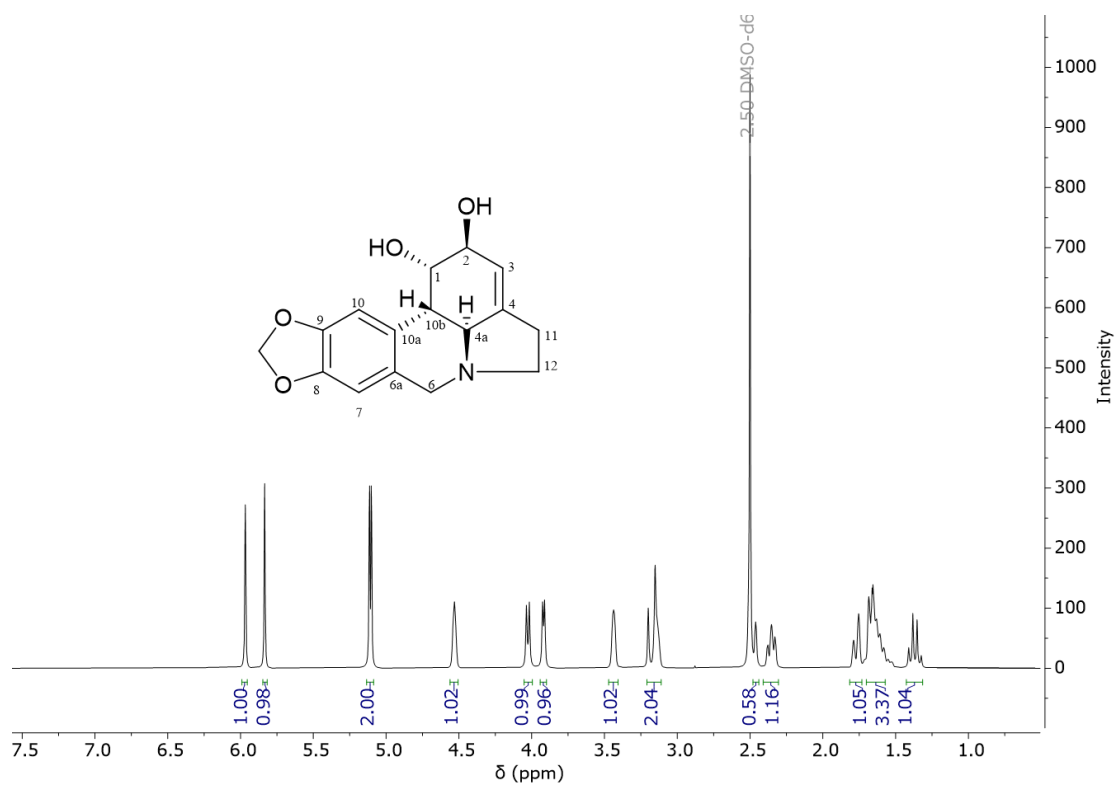

**Figure S5.**  $^1\text{H}$ -NMR spectrum of compound **5** (300 MHz,  $\text{DMSO}-d_6$ ).

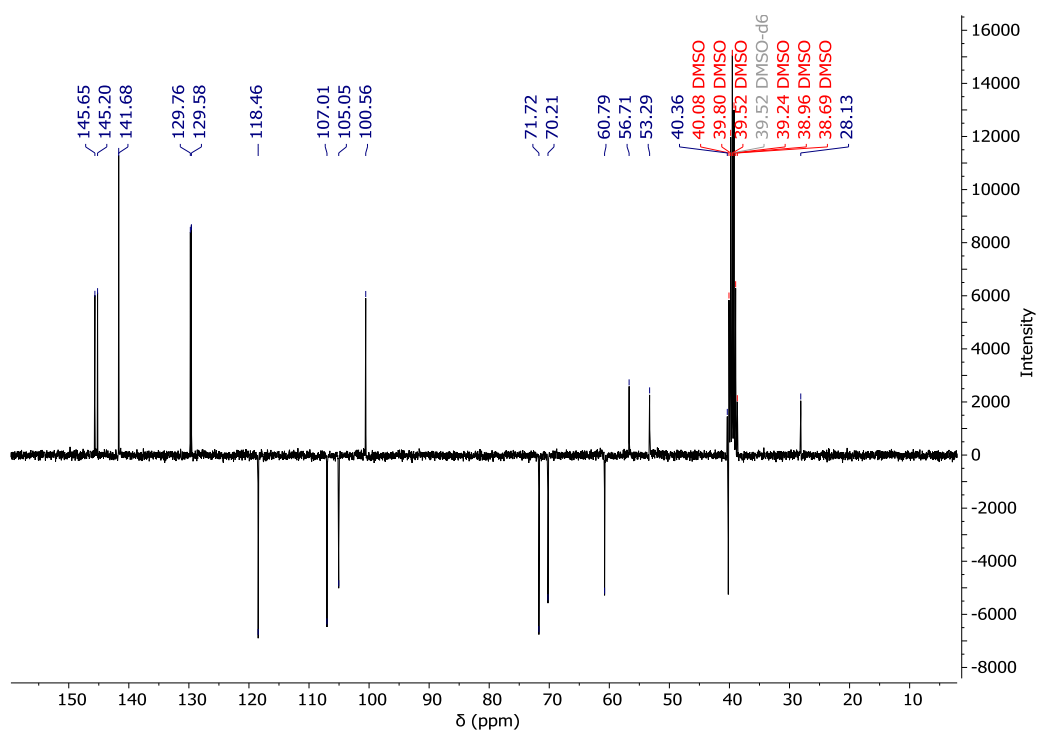

**Figure S6.**  $^{13}\text{C}$ -APT NMR spectrum of compound **5** (75 MHz,  $\text{DMSO}-d_6$ ).

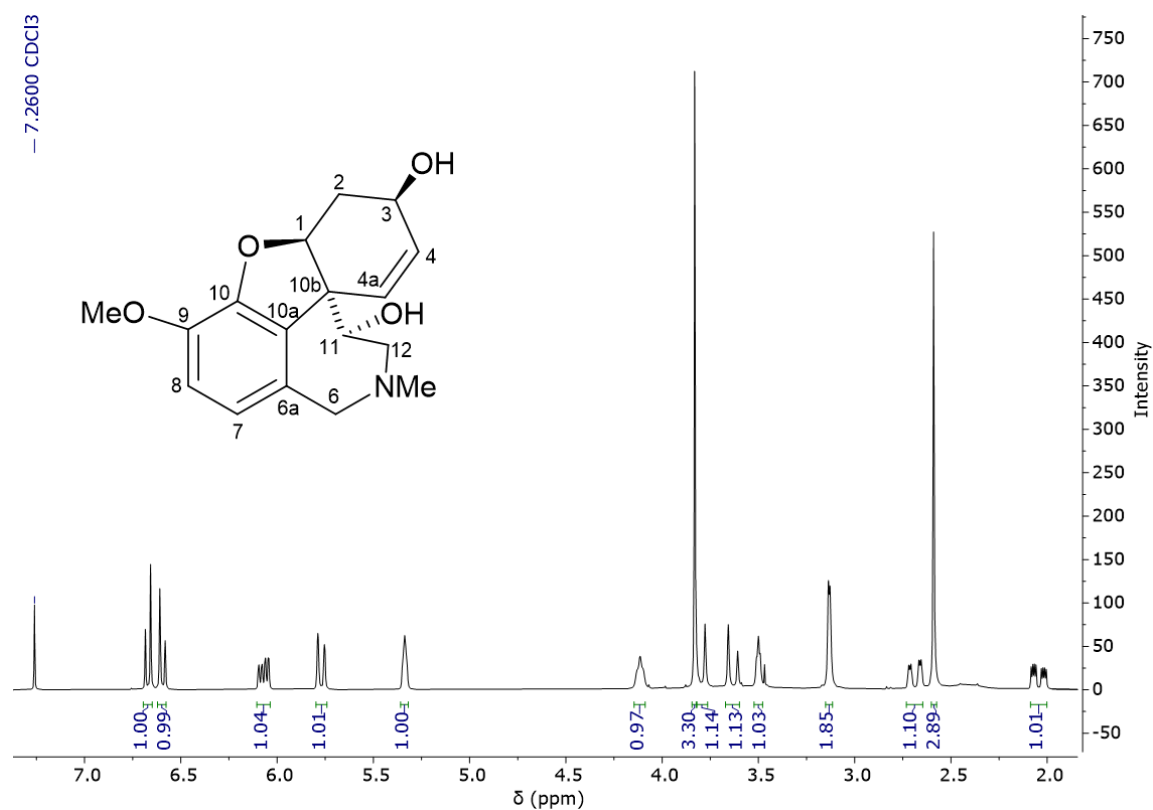

**Figure S7.**  $^1\text{H}$ -NMR spectrum of compound **6** (300 MHz,  $\text{CDCl}_3$ ).

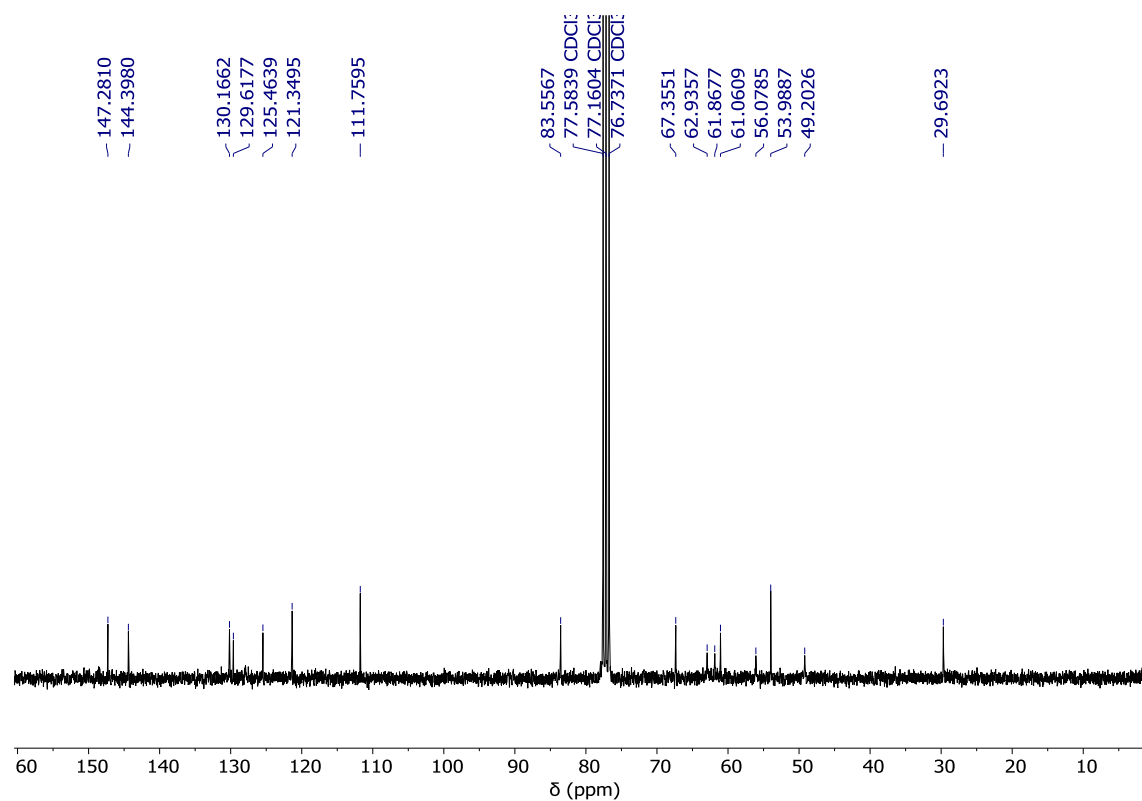

**Figure S8.**  $^{13}\text{C}$ -NMR spectrum of compound **6** (75 MHz,  $\text{CDCl}_3$ ).

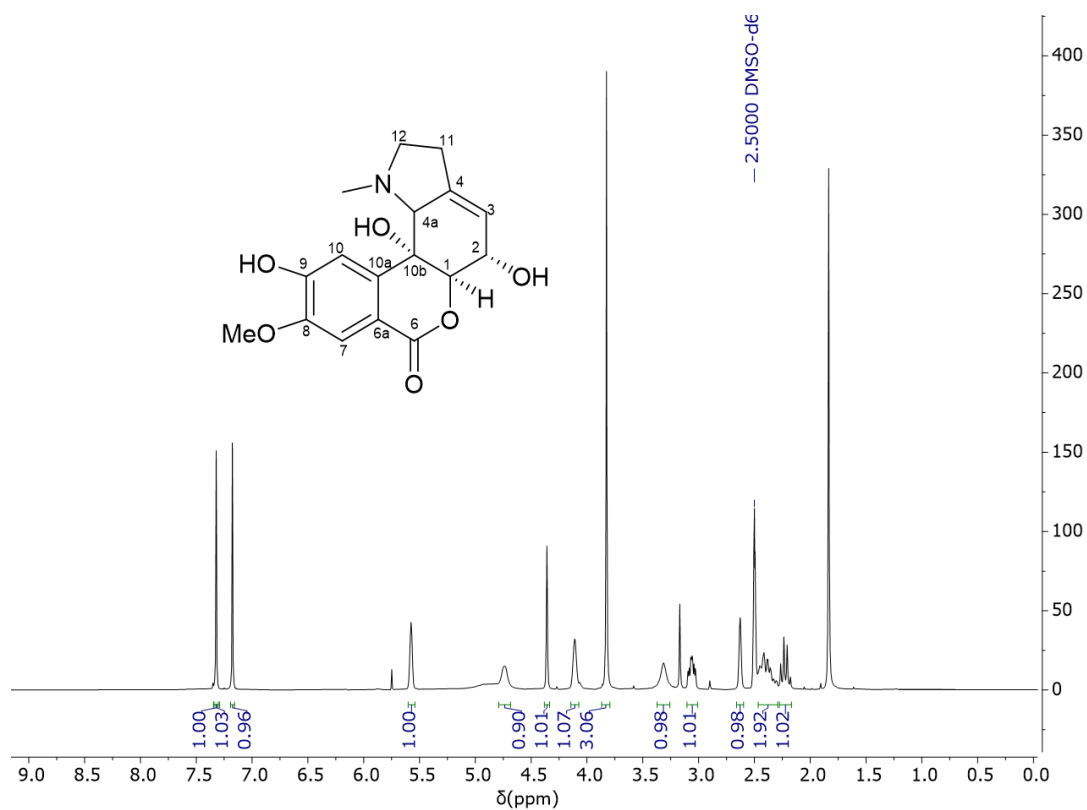

**Figure S9.**  $^1\text{H}$ -NMR spectrum of compound **7** (300 MHz,  $\text{DMSO}-d_6$ ).

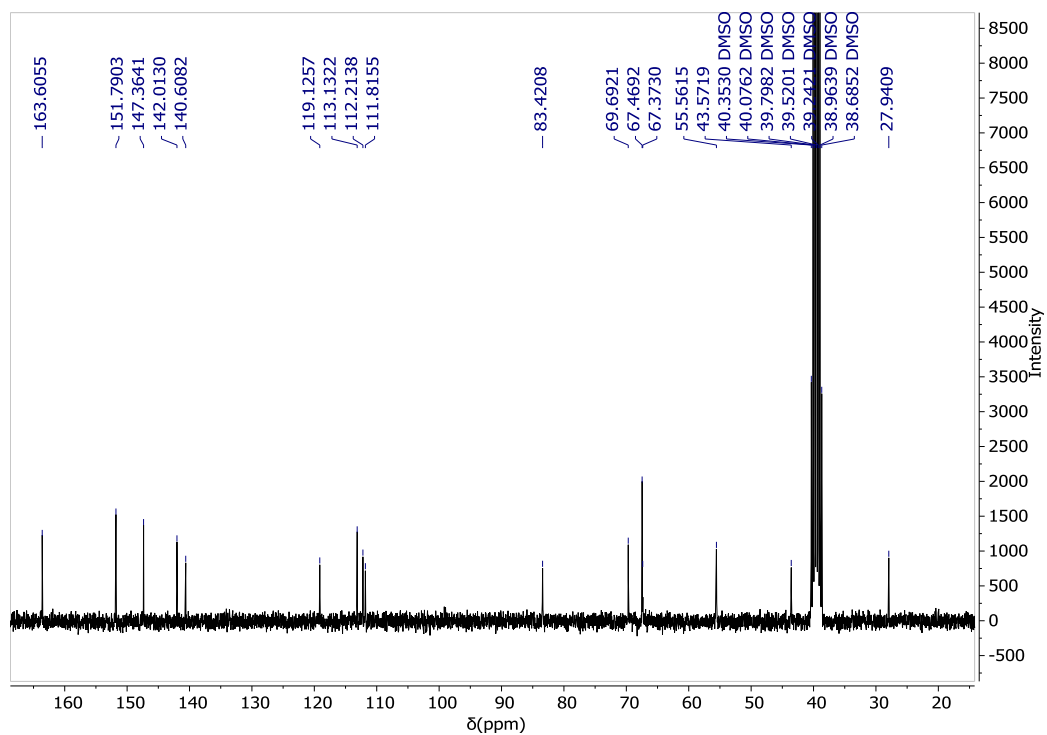

**Figure S10.**  $^{13}\text{C}$  NMR spectrum of compound **7** (75 MHz,  $\text{DMSO}-d_6$ ).

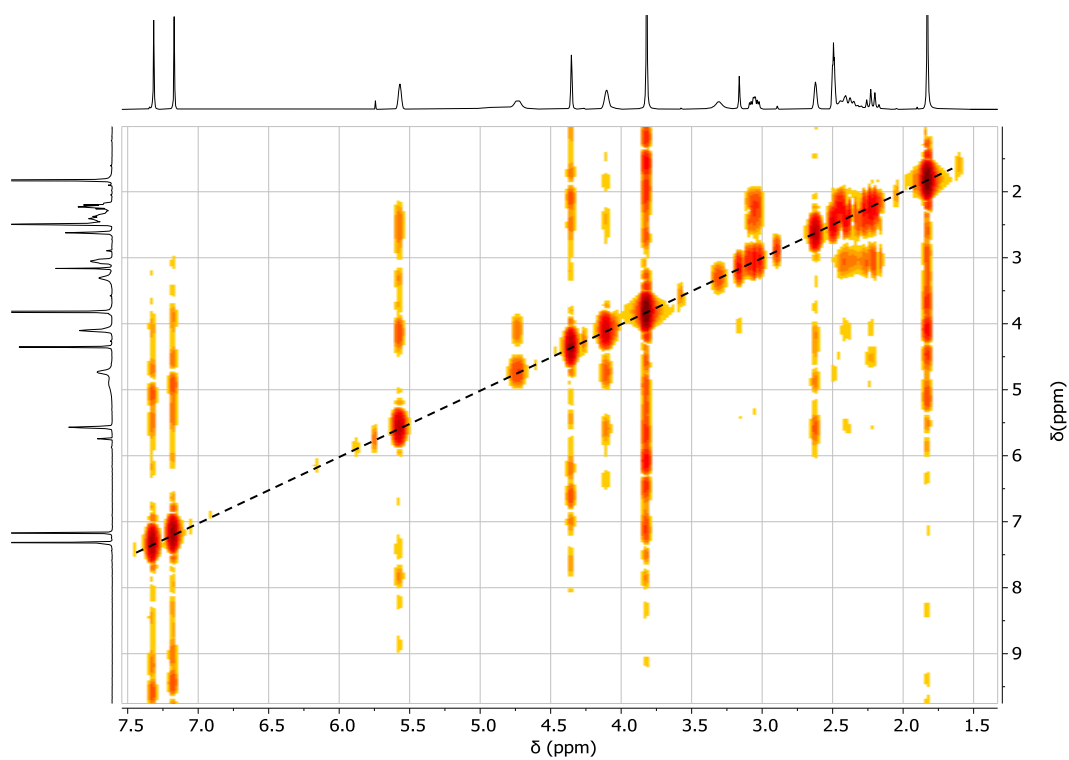

**Figure S11.** COSY spectrum of compound 7.

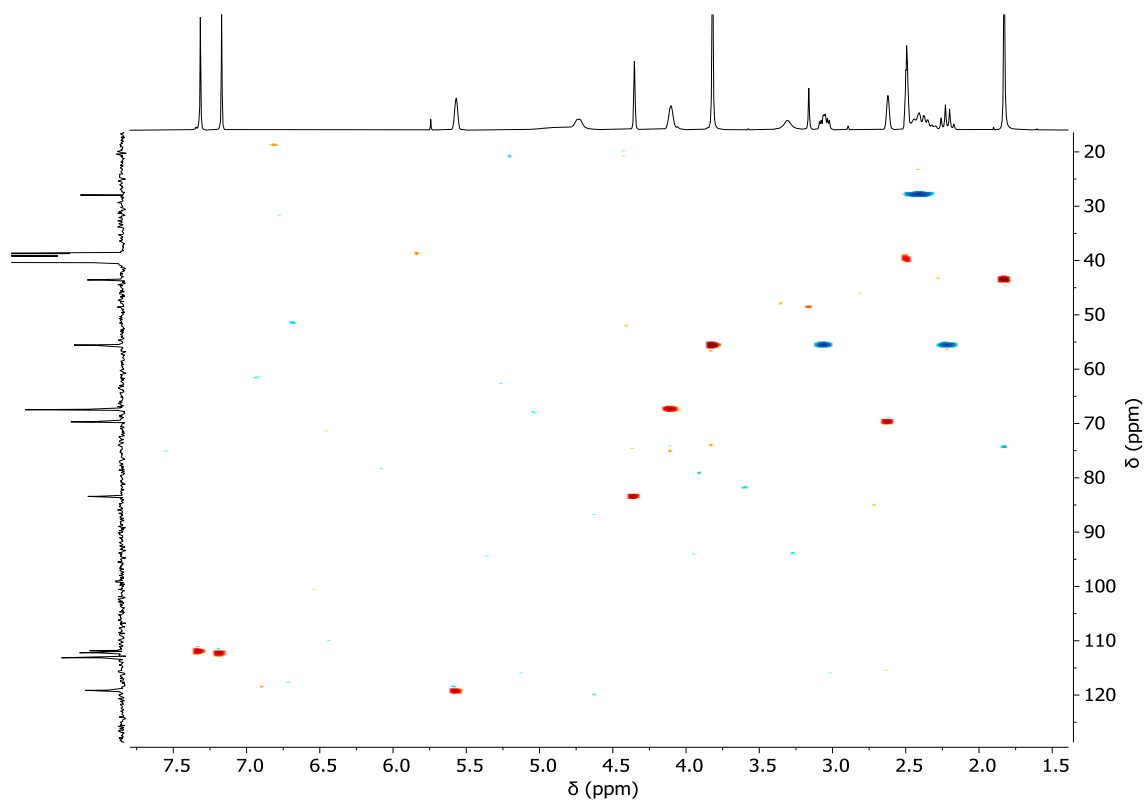

**Figure S12.** HMQC spectrum of compound 7.

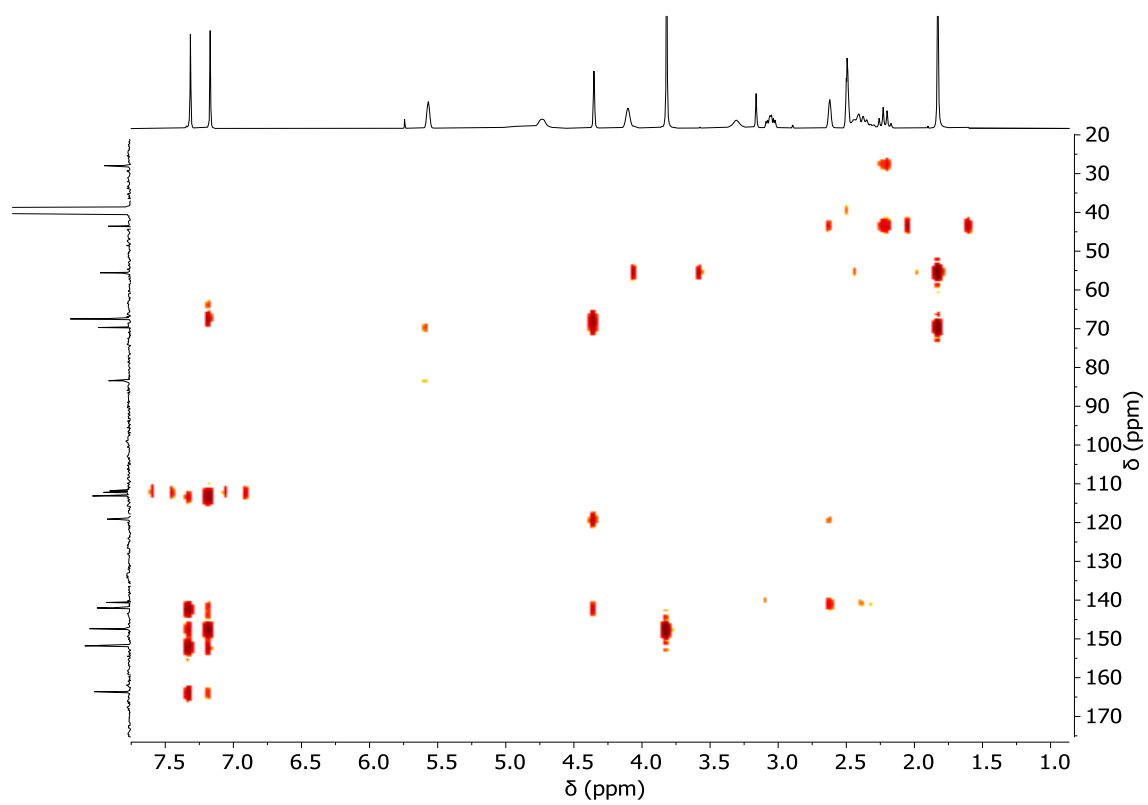

**Figure S13.** HMBC spectrum of compound 7.

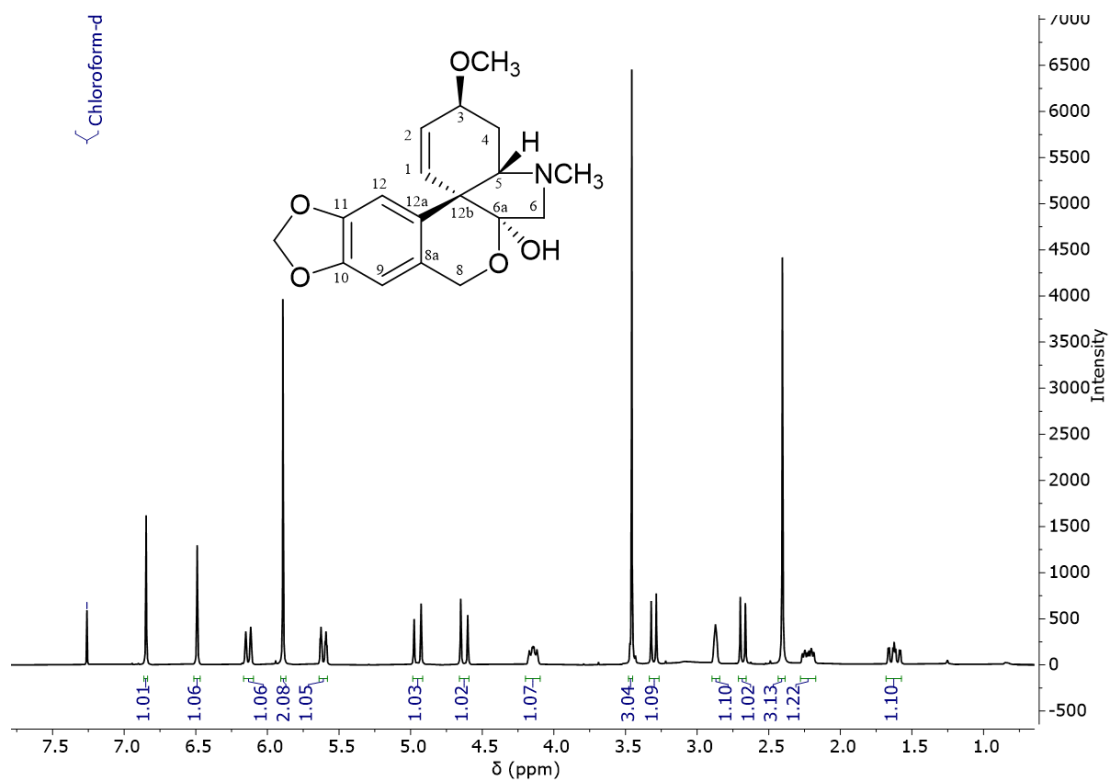

Figure S14. <sup>1</sup>H-NMR spectrum of compound 10 (300 MHz, CDCl<sub>3</sub>).

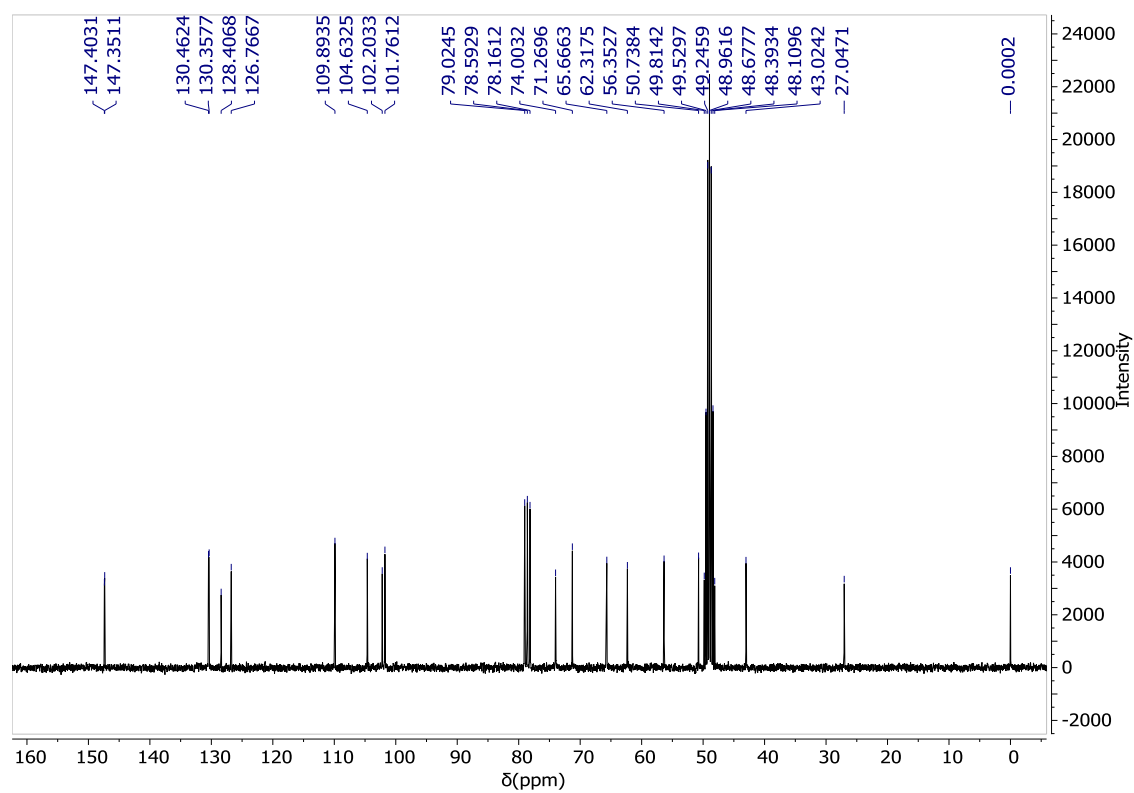

Figure S15. <sup>13</sup>C-NMR spectrum of compound 10 (75 MHz, CDCl<sub>3</sub>/CD<sub>3</sub>OD).

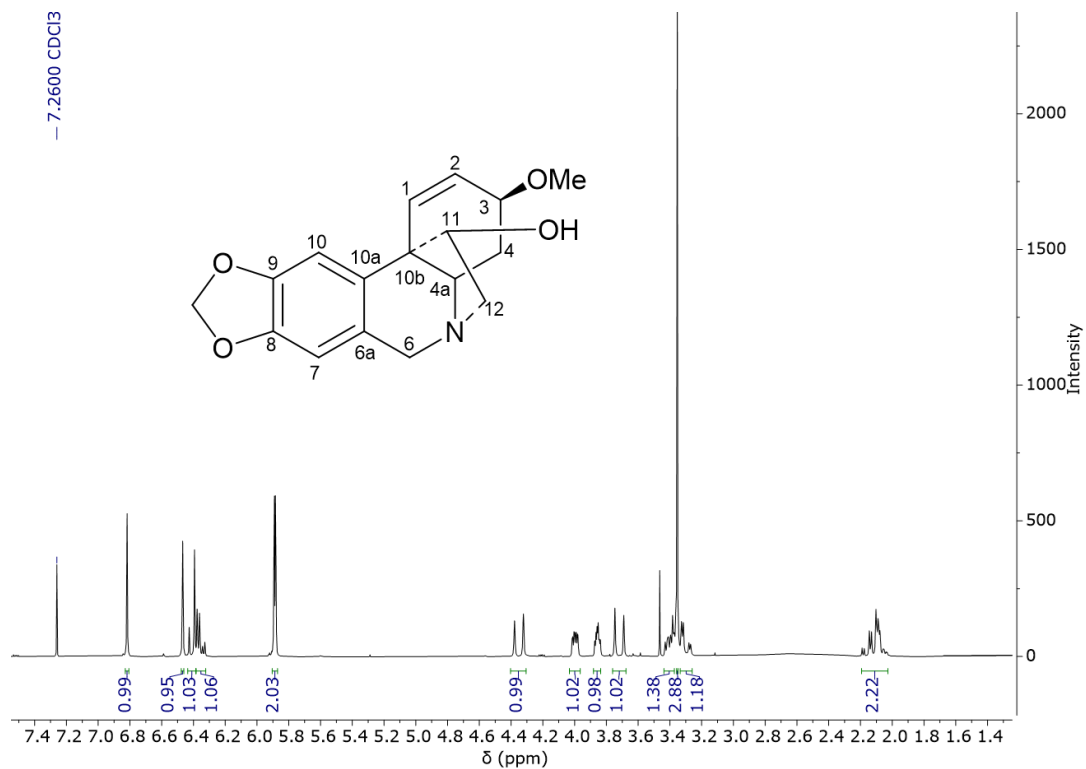

**Figure S16.**  $^1\text{H-NMR}$  spectrum of compound 11 (300 MHz,  $\text{CDCl}_3$ ).

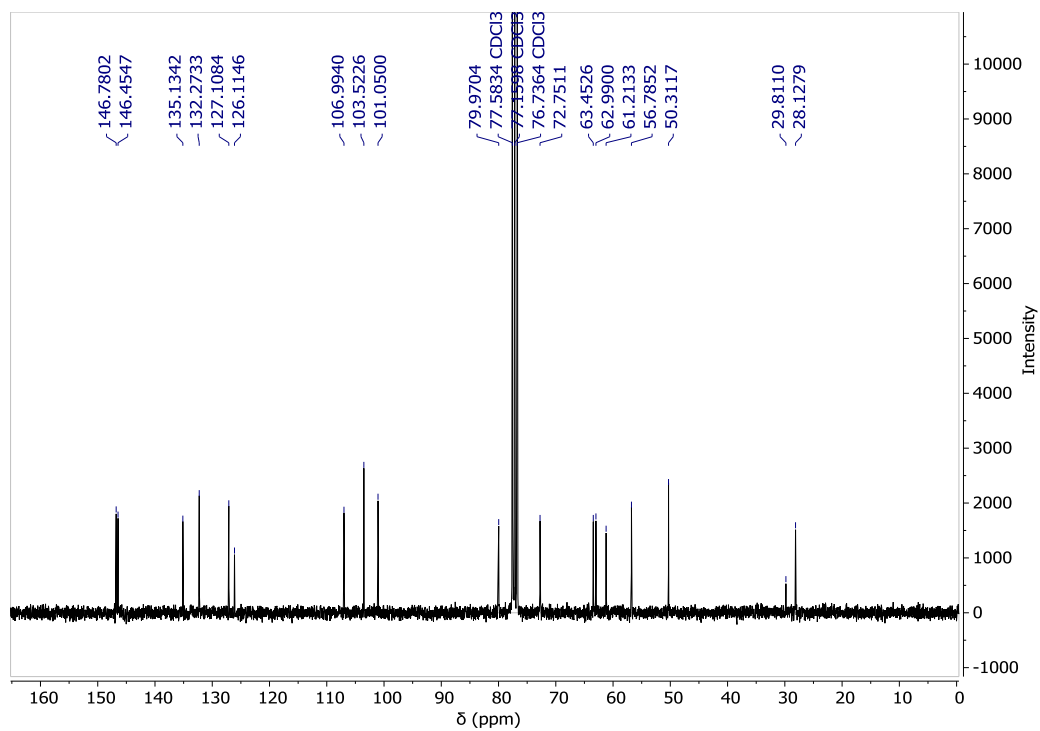

**Figure S17.**  $^{13}\text{C-NMR}$  spectrum of compound 11 (75 MHz,  $\text{CDCl}_3$ ).

## References

1. Fukuda, N.; Yonemitsu, M.; Kimura, T. Studies on the Constituents of the Stems of *Tinospora Tuberculata* N-Trans and N-Cis-Feruloyl Tyramine, and a New Phenolic Glucoside Tinotuberide. *Chem. Pharm. Bull* **1983**, *31*(1), 156–161.
2. Ghosal, S.; S. Saini, K.; Razdan, S. Crinum Alkaloids: Their Chemistry and Biology. *Phytochemistry* **1985**, *24*, 2141–2156.
3. Wildman, W.C.; Brown, C.L. The Structure of Habranthine. *Tetrahedron Lett.* **1968**, *9*, 4573–4576.
4. Carvalho, K.R.; Silva, A.B.; Torres, M.C.M.; Pinto, F.C.L.; Guimarães, L.A.; Rocha, D.D.; Silveira, E.R.; Costa-Lotufo, L. V.; Braz-Filho, R.; Pessoa, O.D.L. Cytotoxic Alkaloids from *Hippeastrum Solandriiflorum* Lindl. *J. Braz. Chem. Soc.* **2015**, *26*, 1976–1980.
5. Bastida, J.; Viladomat, F.; Codina, C. Narcissus Alkaloids. In *Studies in Natural Products Chemistry*; 1997; Vol. 20, pp. 323–405.
6. Döpke, W.; Pham, L.H.; Gründemann, E.; Bartoszek, M.; Flatau, S. Alkaloids from *Hippeastrum Equestre* ; Part I : Phamine , a New Phenanthridone Alkaloid. *Planta Med* **1995**, *61*, 564–566.
